# Supplementary material for: Bisphenol A Acts As Developmental Agonist in Culex Quinquefasciatus Say
Source: Research Square preprint supplement (doi:10.21203/rs.3.rs-401763/v1), 2021-04-26
Supplement: Supplementary file 1 [file fec4a28d2fa872d08fc46a01.docx]

**List of supplementary materials:**

**Table S. 1 The primer sequences used for quantitative real time PCR**

**Table S. 2 Determination of LD 50 of Bisphenol A in fourth instar larvae of *Culex quinquefasciatus.***

**Table S. 1**

**The primer sequences used for quantitative real time PCR**

| Gene | Forward | | Reverse | |
| --- | --- | --- | --- | --- |
| Sequence (5′ 3′) | Tm | Sequence (5′ – 3′) | Tm |
| Cq S7RP | ACCGCCGTCTACGATGCCA | 61.0 | ATGGTGGTCTGCTGGTTCTT | 57.3 |
| Cq EcRA | CCGTTACGGTTTACGCTAGTG | 59.8 | TAGCCATTGGACATGGTGGTA | 57.9 |
| Cq E75A | CTCAGTCGCAAACACCGGTCA | 61.8 | TGTAAACTCTTTTGGCGGCCGA | 60.3 |

**Table S. 2**

**Determination of LD 50 of Bisphenol A in fourth instar larvae of *Culex quinqnefasciatus.***

| Sl.No. | Concentration of BPA (ppm) | Mortality after 48 hours* | LC50 (Probit 0.500) | 95% confidance Limit | Intercept (mean + SE) |
| --- | --- | --- | --- | --- | --- |
| 1 | 5 | 0 | 22.334 | 12.374 + 75.440 | -2.063 + 0.247 |
| 2 | 7 | 4 |
| 3 | 10 | 6 |
| 4 | 15 | 12 |
| 5 | 20 | 14 |
| 6 | 25 | 18 |
| 7 | 30 | 24 |
| 8 | 35 | 31 |
| 9 | 40 | 43 |

* 50 larvae were used for toxicity study in each dose.

PROBIT (p) = Intercept + BX

(Covariates x are transformed using the base 10,000 logarithm) were B is the regression coefficient.
